# Supplementary material for: Synthesis and characterization of novel poly(sulfone siloxane)s with good solubility and recyclability based on siloxane units
Source: Royal Society of Chemistry journal article supplement (doi:10.1039/d2nj00934j), 2022-01-01
Supplement: d2nj00934j1.pdf [file d2nj00934j1.pdf]

## **Electronic Supplementary Information**

### **Synthesis and characterization of novel poly(sulfone siloxane)s with good solubility and recyclability based on siloxane units**

Yunfan Xu, Mengdong Guo, Shilong Lu, Zengyue Wei, and Shengyu Feng\*

Key Laboratory of Special Functional Aggregated Materials & Key Laboratory of Colloid and Interface Chemistry of Ministry of Education, Shandong Key Laboratory of Advanced Silicone Materials and Technology, School of Chemistry and Chemical Engineering, Shandong University, Jinan 250199, P. R. China. Email: [fsy@sdu.edu.cn](mailto:fsy@sdu.edu.cn)

## Table of Contents

|                                                                                                                         |   |
|-------------------------------------------------------------------------------------------------------------------------|---|
| <b>Fig. S1</b> $^1\text{H}$ NMR spectrum of (a) SCS1, (b) SCS2 and (c) SCS3.....                                        | 3 |
| <b>Fig. S2</b> $^{13}\text{C}$ NMR of (a) SCS1, (b) SCS2 and (c) SCS3 .....                                             | 4 |
| <b>Fig. S3</b> UPLC-MS data of (a) SCS1, (b) SCS2 and (c) SCS3.....                                                     | 5 |
| <b>Fig. S4</b> (a) DSC curves of SCS1, SCS2 and SCS3; (b) TGA curves of SCS1, SCS2 and SCS3.....                        | 5 |
| <b>Fig. S5</b> $^1\text{H}$ NMR spectrum of (a) PSS1, (b) PSS2 and (c) PSS3 .....                                       | 6 |
| <b>Fig. S6</b> UPLC-MS data of the (a) SCS1, (b) SCS2 and (c) SCS3 obtained from the depolymerization of polymers ..... | 7 |
| <b>Fig. S7</b> GPC traces of the crude products after depolymerization .....                                            | 7 |
| <b>Fig. S8</b> GPC traces of the (a) PSS1; (b) SCS1 obtained by the depolymerization.....                               | 8 |
| <b>Table S1</b> Results of the polymerization of monomers at different temperature .....                                | 8 |
| <b>Table S2</b> The solubility results of polymers in different solvents at room temperature                            | 8 |

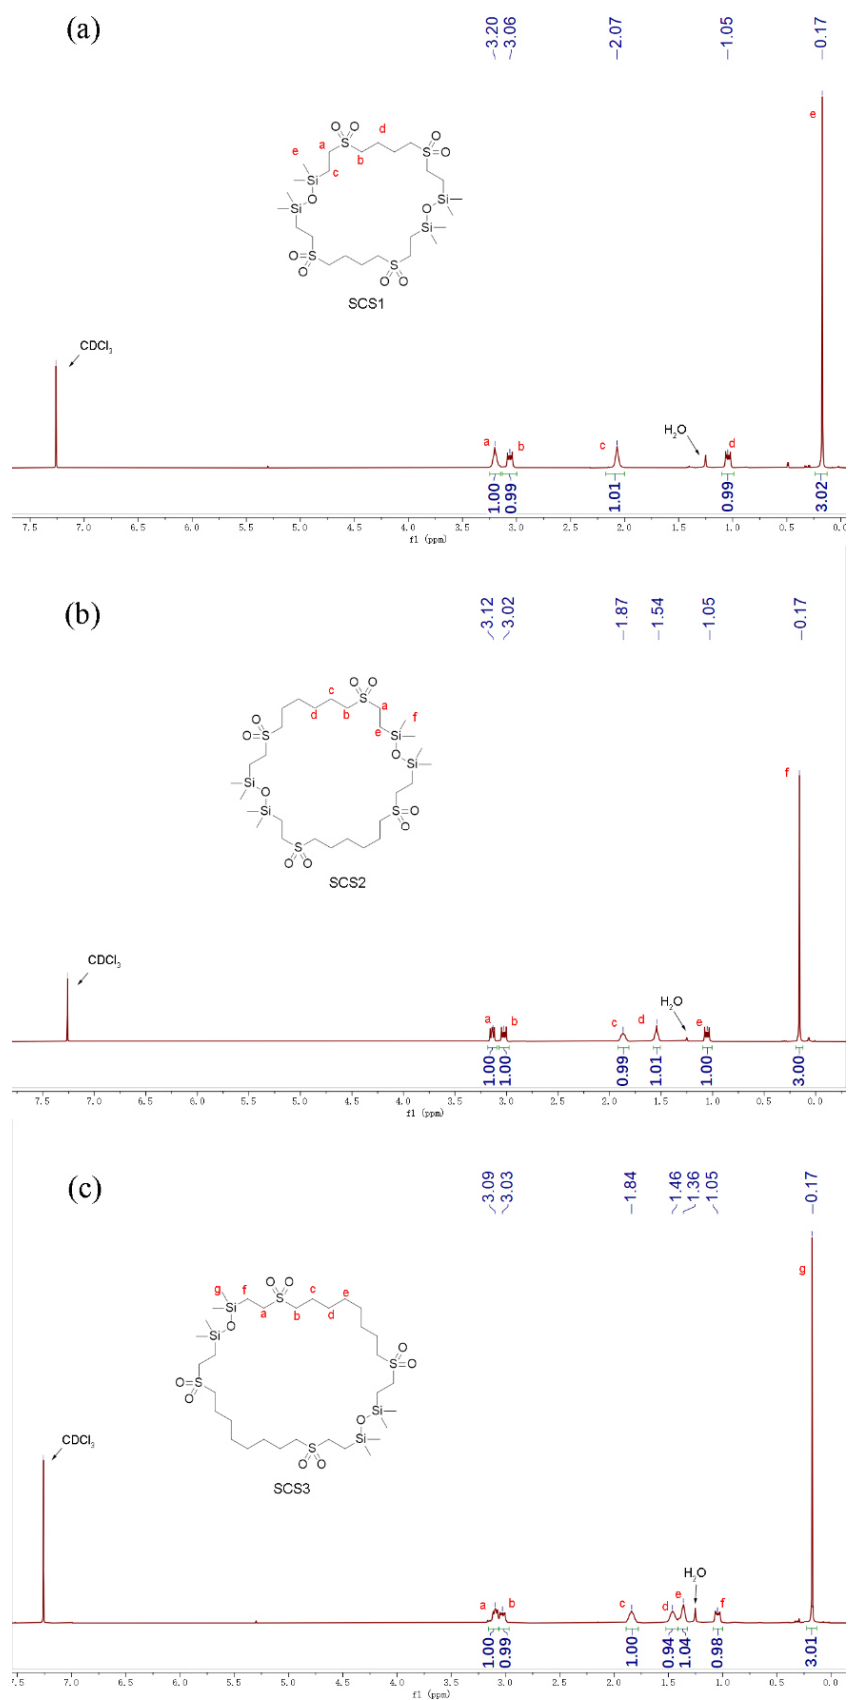

**Fig. S1** <sup>1</sup>H NMR spectrum of (a) SCS1, (b) SCS2 and (c) SCS3

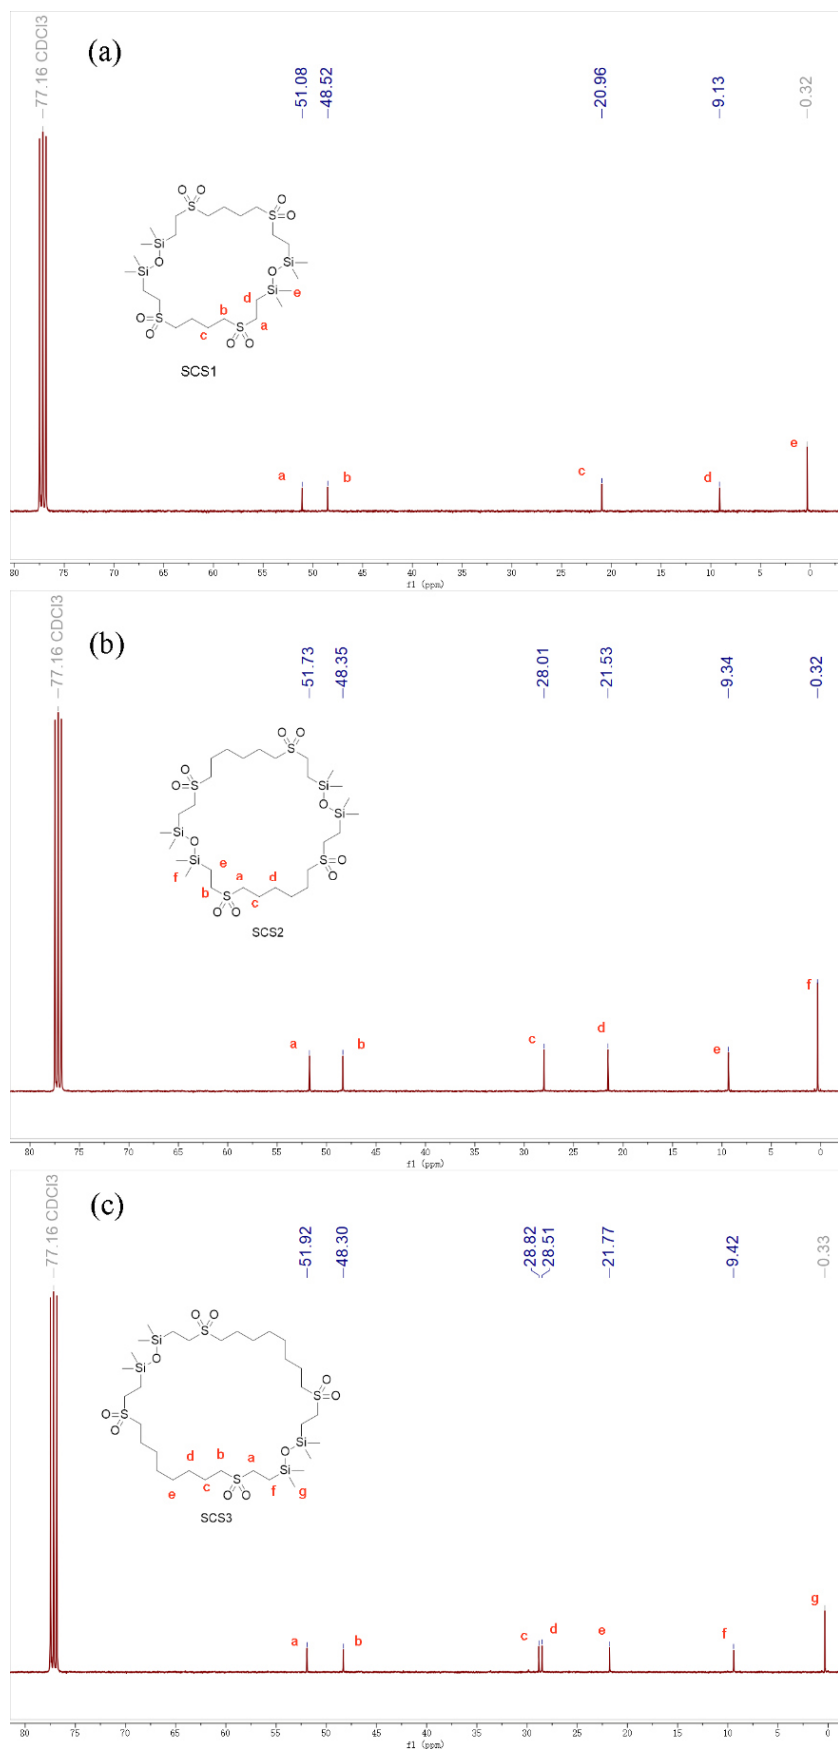

**Fig. S2** <sup>13</sup>C NMR of (a) SCS1, (b) SCS2 and (c) SCS3

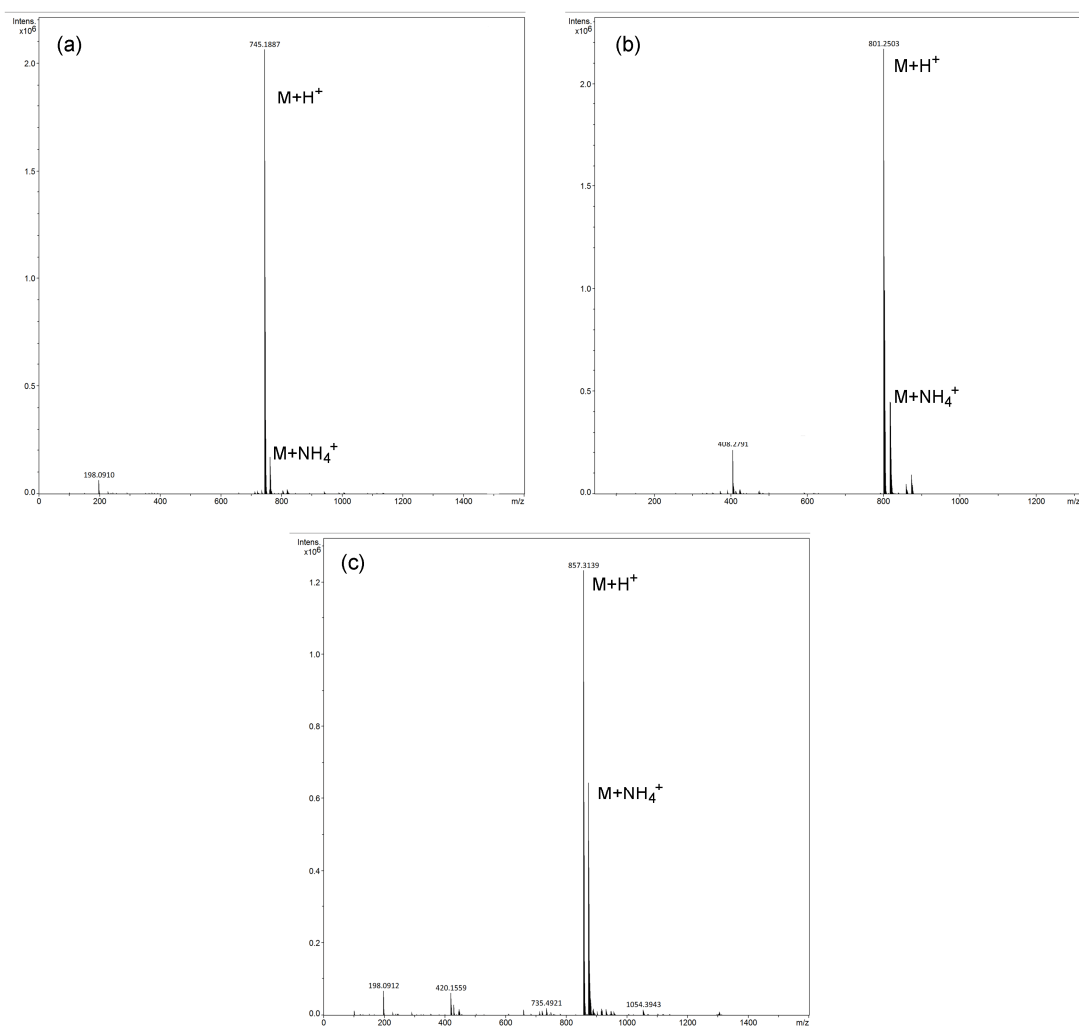

**Fig. S3** UPLC-MS data of (a) SCS1, (b) SCS2 and (c) SCS3

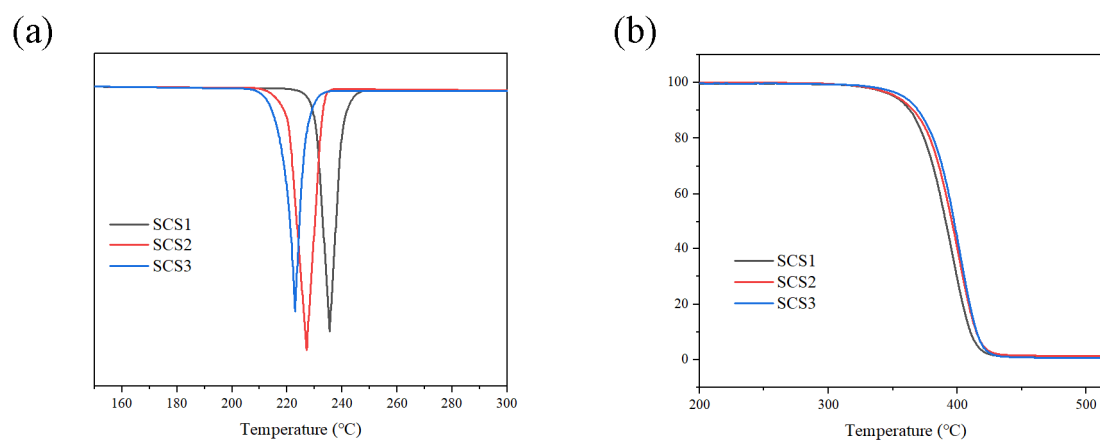

**Fig. S4** (a) DSC curves of SCS1, SCS2 and SCS3; (b) TGA curves of SCS1, SCS2 and SCS3

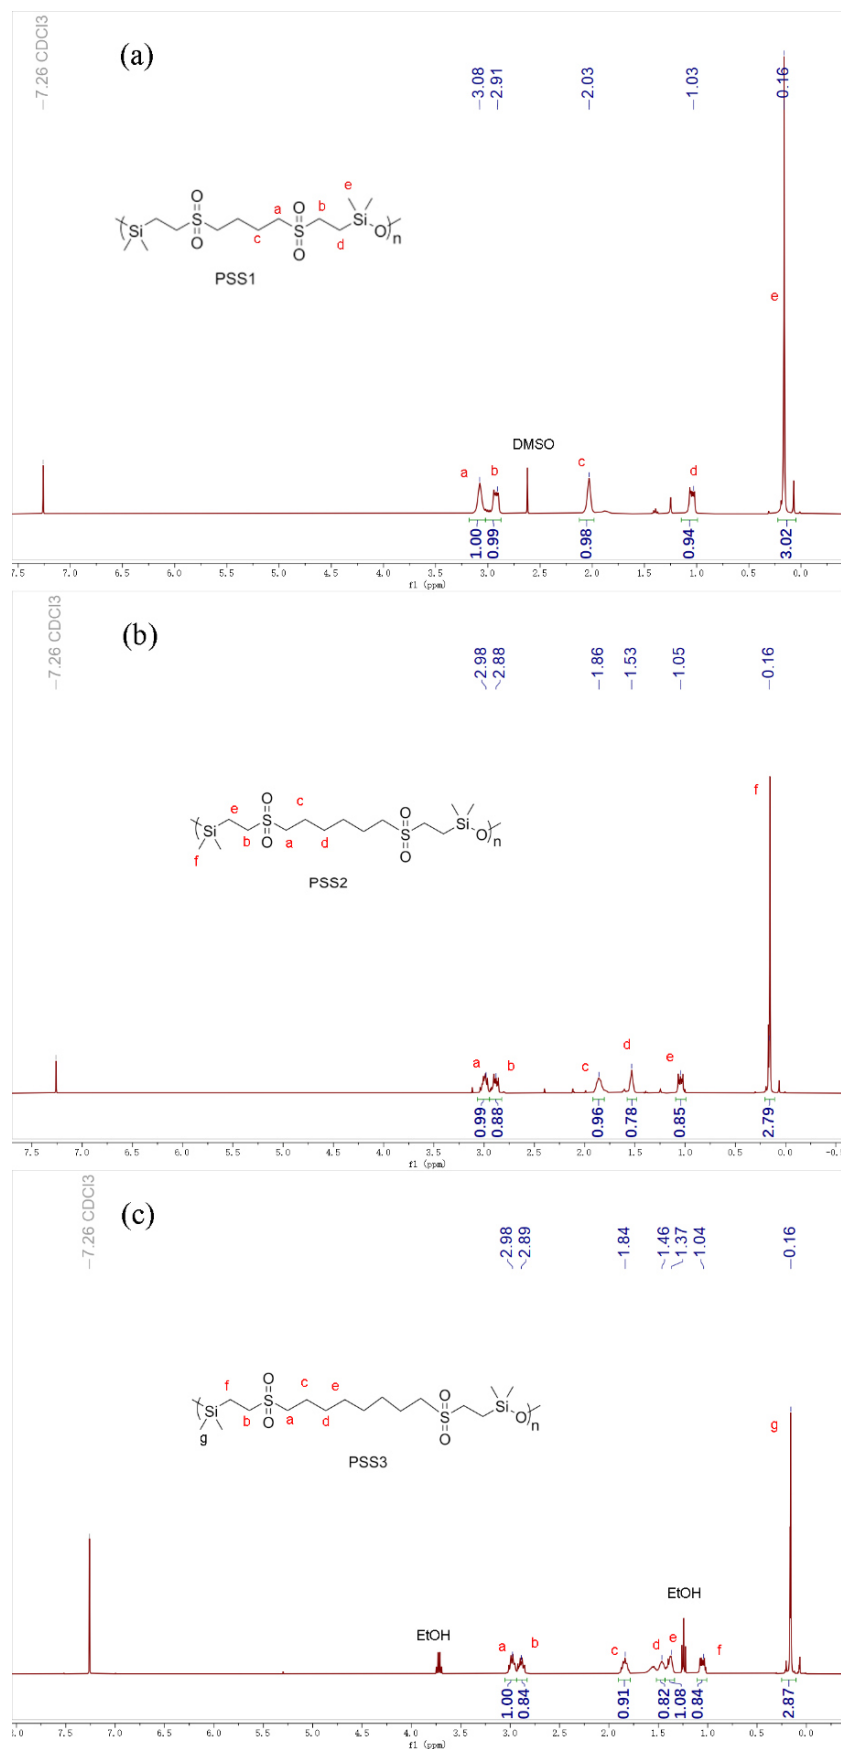

**Fig. S5**  $^1\text{H}$  NMR spectrum of (a) PSS1, (b) PSS2 and (c) PSS3

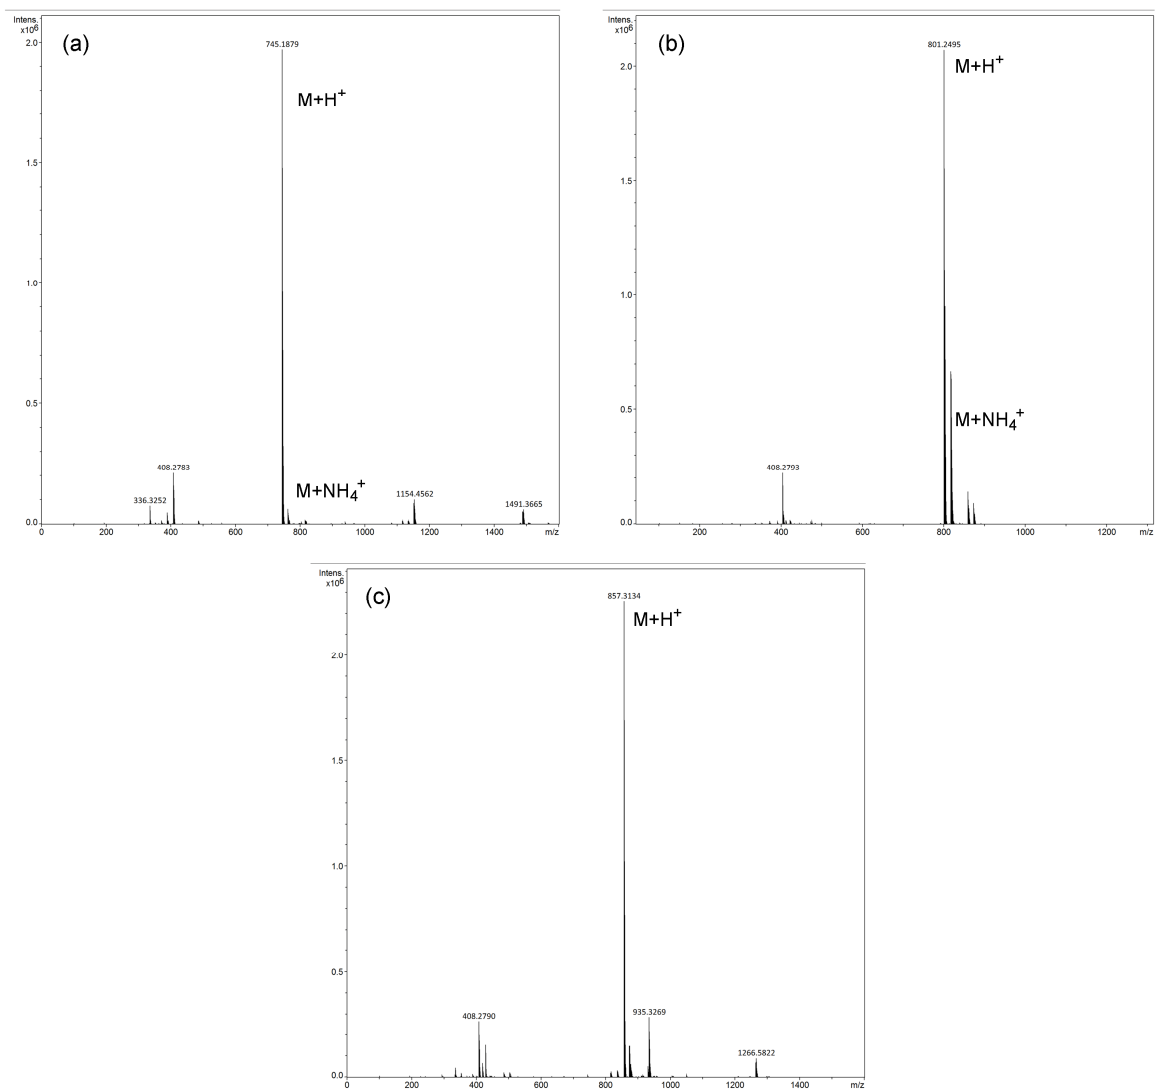

**Fig. S6** UPLC-MS data of the (a) SCS1, (b) SCS2 and (c) SCS3 obtained from the depolymerization of polymers

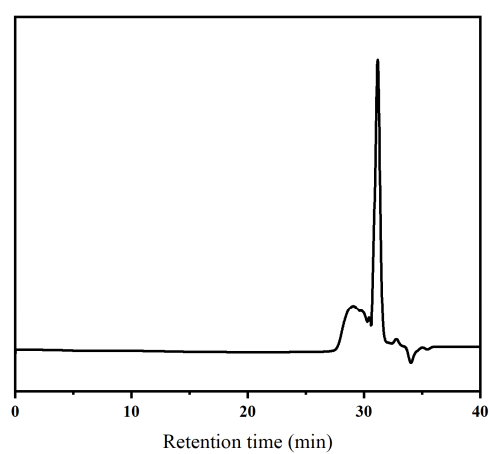

**Fig. S7** GPC traces of the crude products after depolymerization

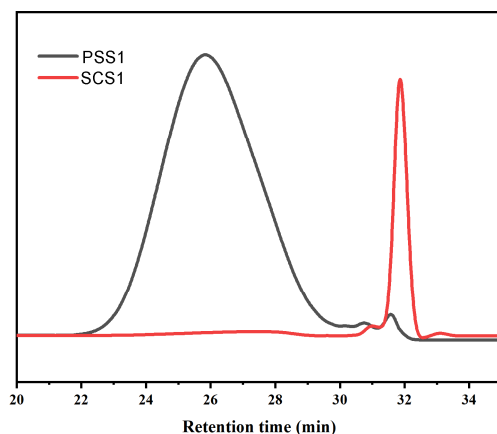

**Fig. S8** GPC traces of the (a) PSS1; (b) SCS1 obtained by the depolymerization

**Table S1** Results of the polymerization of monomers at different temperature

| Entry | Monomers | Catalyst | M/C <sub>a</sub> | Solvent | Temp. (°C) | Yield (%) | M <sub>n</sub> (kDa) <sub>b</sub> | Đ <sub>b</sub> |
|-------|----------|----------|------------------|---------|------------|-----------|-----------------------------------|----------------|
| 1     | SCS1     | KOH      | 20/1             | DMSO    | 110        | 31        | --                                | --             |
| 2     | SCS1     | KOH      | 20/1             | DMSO    | 140        | 94        | 13.2                              | 1.50           |
| 3     | SCS1     | KOH      | 20/1             | DMSO    | 160        | 97        | 13.6                              | 1.51           |
| 4     | SCS2     | KOH      | 20/1             | DMSO    | 160        | 95        | 13.3                              | 1.55           |
| 5     | SCS3     | KOH      | 20/1             | DMSO    | 160        | 95        | 13.1                              | 1.53           |

<sup>a</sup> Molar ratio of Monomer-to-catalyst

<sup>b</sup> M<sub>n</sub> and Đ were determined by GPC at 40 °C in THF relative to polystyrene standards

**Table S2** The solubility results of polymers in different solvents at room temperature

| Monomers | CHCl <sub>3</sub> <sup>a</sup> (g mL <sup>-1</sup> ) | THF <sup>b</sup> (g mL <sup>-1</sup> ) | DMF <sup>c</sup> (g mL <sup>-1</sup> ) | DMSO <sup>d</sup> (g mL <sup>-1</sup> ) |
|----------|------------------------------------------------------|----------------------------------------|----------------------------------------|-----------------------------------------|
| PSS1     | 0.12                                                 | 0.18                                   | 0.24                                   | 0.33                                    |
| PSS2     | 0.10                                                 | 0.14                                   | 0.21                                   | 0.29                                    |
| PSS3     | 0.09                                                 | 0.11                                   | 0.17                                   | 0.23                                    |

<sup>a</sup> CHCl<sub>3</sub> Chloroform; <sup>b</sup> THF Tetrahydrofuran; <sup>c</sup> DMF N,N-dimethylformamide <sup>d</sup> DMSO Dimethyl sulfoxide
